# Supplementary material
Source: PubMed Central journal article supplement (PMC7966473)
Supplement: 3790_table.pdf [file 3790_table.pdf]

**On-line Table: Clinical Information<sup>a</sup>**

| Patient No. | Sex/Age (yr) | ICA Size (mm) | FD Size (mm)                              | Aneurysm/Size/Neck (mm)   | FD Deployment                                                                               | Follow-Up/Comments                                                                                                                                                     |
|-------------|--------------|---------------|-------------------------------------------|---------------------------|---------------------------------------------------------------------------------------------|------------------------------------------------------------------------------------------------------------------------------------------------------------------------|
| 1           | F/67         | 4.3           | 4.0 × 30                                  | R supraclinoid ICA/24/8   | Optimally deployed                                                                          | Angiographic occlusion by 6 months and remains occluded at 27 months                                                                                                   |
| 2           | F/46         | 3.7           | 3.0 × 25                                  | R supraclinoid ICA/18/4.5 | Optimally deployed                                                                          | Immediate angiographic occlusion                                                                                                                                       |
| 3           | F/57         | 4.6           | Tapered Silk, 4.5, 3.5 × 30 <sup>b</sup>  | R supraclinoid ICA/7.8/4  | Optimally deployed                                                                          | Immediate angiographic occlusion                                                                                                                                       |
| 4           | F/41         | 4.1           | 4.0 × 35                                  | L cavernous ICA/20/10     | Optimally deployed                                                                          | Occlusion at 6 weeks                                                                                                                                                   |
| 5           | F/38         | 4.5           | 4.5 × 40                                  | L base of skull ICA/28/10 | Optimally deployed                                                                          | Large residual aneurysm at 6 months; no symptoms; retreated with non-FD covered stent after 6 months                                                                   |
| 6           | F/72         | 4.5           | 4.0 × 30 (first FD), 3.5 × 35 (second FD) | R cavernous ICA/20/8      | Malpositioned, leaving a gap at the inflow of the aneurysm, which was not covered by the FD | Large residual aneurysm at 6 months; no symptoms; retreated at 6 months with double FDs                                                                                |
| 7           | F/56         | 4.3           | 3.5 × 30 (first FD), 3.5 × 25 (second FD) | R supraclinoid ICA/13/7   | Optimally deployed                                                                          | 90% Occluded at 3 months; increasing headache at 3 months with adverse MRI changes; retreated at 3 months with double FDs, with resolution of symptoms and MRI changes |
| 8           | F/47         | 4.0           | 4.0 × 35                                  | R cavernous ICA/21/20     | Stretched during deployment and angioplastied, damaging the FD                              | Aneurysm rupture resulting in carotid cavernous fistula at 3.5 months; treated by vessel sacrifice                                                                     |

**Note:**—R indicates right; L, left.

<sup>a</sup> A tapered Silk FD used as the diameter of the ICA proximal to the aneurysm was 4.6 mm and the distal diameter was 3.1 mm.

<sup>b</sup> Tapered FD; proximal diameter, 4.5 mm; distal diameter, 3.5 mm; length, 30 mm.
